# Supplementary material for: Comment on: Intrapulmonary shunt and alveolar dead space in a cohort of patients with acute COVID-19 pneumonitis and early recovery
Source: PubMed Central journal article supplement — Eur Respir J. 2023 Feb 9;61(2):2202121. doi: 10.1183/13993003.02121-2022 (PMC9909205; doi:10.1183/13993003.02121-2022), 2023-02-09

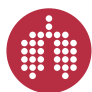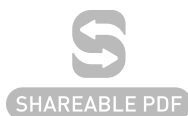

# Comment on: Intrapulmonary shunt and alveolar dead space in a cohort of patients with acute COVID-19 pneumonitis and early recovery

Maximilian Ackermann <sup>1,2</sup>, Paul Tafforeau<sup>3</sup>, Joseph Brunet<sup>3</sup>, Jan C. Kamp <sup>4,5</sup>, Christopher Werlein<sup>6</sup>, Mark P. Kühnel<sup>5,6</sup>, Joseph Jacob <sup>7,8</sup>, Claire L. Walsh<sup>9</sup>, Peter D. Lee <sup>9</sup>, Tobias Welte <sup>4,5</sup> and Danny D. Jonigk<sup>5,10</sup>

<sup>1</sup>Institute of Pathology and Molecular Pathology, Helios University Clinic Wuppertal, University of Witten/Herdecke, Witten, Germany.

<sup>2</sup>Institute of Functional and Clinical Anatomy, University Medical Center of the Johannes Gutenberg-University Mainz, Mainz, Germany.

<sup>3</sup>European Synchrotron Radiation Facility, Grenoble, France. <sup>4</sup>Department of Respiratory Medicine, Hannover Medical School, Hannover, Germany. <sup>5</sup>Biomedical Research in Endstage and Obstructive Lung Disease Hannover (BREATH), Member of the German

Center for Lung Research (DZL), Hannover, Germany. <sup>6</sup>Institute of Pathology, Hannover Medical School, Hannover, Germany. <sup>7</sup>Centre

for Medical Image Computing, University College London, London, UK. <sup>8</sup>Department of Radiology, University College London Hospitals

NHS Foundation Trust, London, UK. <sup>9</sup>Department of Mechanical Engineering, University College London, London, UK. <sup>10</sup>Institute of

Pathology, University Clinics of RWTH University, Aachen, Germany.

Corresponding author: Maximilian Ackermann ([maximilian.ackermann@uni-mainz.de](mailto:maximilian.ackermann@uni-mainz.de))

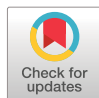

Shareable abstract (@ERSpublications)

**A compelling explanation for mosaic-like micro-ischaemia in the severe pathology of COVID-19 pneumonitis, which reflects the vasculopathy affecting the secondary lobule and the interlobular septae** <http://bit.ly/3GwMkII>

**Cite this article as:** Ackermann M, Tafforeau P, Brunet J, *et al.* Comment on: Intrapulmonary shunt and alveolar dead space in a cohort of patients with acute COVID-19 pneumonitis and early recovery. *Eur Respir J* 2023; 61: 2202121 [DOI: 10.1183/13993003.02121-2022].

This single-page version can be shared freely online.

Copyright ©The authors 2023.

This version is distributed under the terms of the Creative Commons Attribution Non-Commercial Licence 4.0. For commercial reproduction rights and permissions contact [permissions@ersnet.org](mailto:permissions@ersnet.org)

Received: 8 Nov 2022  
Accepted: 13 Nov 2022

*To the Editor:*

With the greatest interest we read the paper by HARBUT *et al.* [1] describing the role of intrapulmonary shunting and alveolar dead space in patients with acute COVID-19 pneumonitis. We are grateful for them sharing their valuable functional blood and alveolar gas exchange data, pointing out a significant alveolar dead space of nearly 30% in recovered COVID-19 patients, suggesting a persistent pulmonary vascular pathology. Although COVID-19 related hypoxaemia is characterised by preserved oxygen saturation, a ventilation-perfusion mismatch and increased alveolar ventilation/perfusion ratio heterogeneity, the underlying morphological evidence of this physiological enigma has not been fully understood.

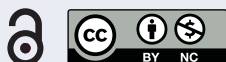

Supplement: ERJ-02121-2022.Shareable.pdf [file ERJ-02121-2022.Shareable.pdf]
